# Supplementary material
Source: PubMed Central journal article supplement (PMC4097585)
Supplement: JB.01537-14_zjb999093233so1.pdf [file JB.01537-14_zjb999093233so1.pdf]

| <b>Table S1. Strains</b>      |                                                    |                         |
|-------------------------------|----------------------------------------------------|-------------------------|
| <b>Strain</b>                 | <b>Genotype and Relevant Features</b>              | <b>Reference</b>        |
| <b><i>E. coli</i></b>         |                                                    |                         |
| Dh5 $\alpha$                  | Standard molecular cloning procedures              | Laboratory collection   |
| <b><i>M. smegmatis</i></b>    |                                                    |                         |
| WT                            | Wild-type <i>M. smegmatis</i> MC2155               | Laboratory collection   |
| MGM365                        | MC2155 $\Delta$ MSMEG_2579 ( <i>rip1</i> ortholog) | Sklar et al. (2010)     |
| JSS158                        | WT MC2155 / pMB124                                 | Schneider et al. (2013) |
| JSS159                        | WT MC2155 / pMB111                                 | Schneider et al. (2013) |
| JSS165                        | WT MC2155 / pJSSMSG1                               | Schneider et al. (2013) |
| JSS161                        | WT MC2155 / pJSS151                                | Schneider et al. (2013) |
| JSS163                        | WT MC2155 / pJSS153                                | This study              |
| JSS164                        | WT MC2155 / pJSS154                                | This study              |
| JSS167                        | WT MC2155 / pJSS156                                | Schneider et al. (2013) |
| JSS169                        | WT MC2155 / pJSS158                                | This study              |
| JSS170                        | WT MC2155 / pJSS159                                | This study              |
| JSS115                        | WT MC2155 / pJSS135                                | This study              |
| JSS116                        | MC2155 $\Delta$ MSMEG_2579 / pJSS135               | This study              |
| JSS156                        | WT MC2155 / pJSS144                                | This study              |
| JSS157                        | MC2155 $\Delta$ MSMEG_2579 / pJSS144               | This study              |
| <b><i>M. tuberculosis</i></b> |                                                    |                         |
| EF2                           | WT <i>M. tuberculosis</i> Erdman (animal passaged) | Laboratory collection   |
| MGM3206                       | EF2 $\Delta$ <i>rip1::loxP</i>                     | Sklar et al. (2010)     |
| JSS005                        | EF2 $\Delta$ <i>sigD::hyg</i>                      | This study              |
| JSS006                        | EF2 $\Delta$ <i>rsdA::hyg</i>                      | This study              |
| JSS007                        | MGM3206 / $\Delta$ <i>sigD::hyg</i>                | This study              |
| JSS008                        | MGM3206 / $\Delta$ <i>rsdA::hyg</i>                | This study              |
| MGM3200                       | EF2 <i>sigK::hyg</i>                               | Sklar et al. (2010)     |
