# Supplementary material
Source: PubMed Central journal article supplement (PMC4097585)
Supplement: JB.01537-14_zjb999093233so2.pdf [file JB.01537-14_zjb999093233so2.pdf]

| <b>Table S2. Plasmids</b> |                                                                      |                               |
|---------------------------|----------------------------------------------------------------------|-------------------------------|
| <b>Name</b>               | <b>Relevant Features</b>                                             | <b>Reference</b>              |
| pMB11<br>1                | Polylinker for C-terminal fusions to PhoA                            | Courtesy of Miriam Braunstein |
| pMB12<br>4                | C-terminal PhoA fusion to Antigen-85 (secreted protein)              | Courtesy of Miriam Braunstein |
| pJSSMS<br>G1              | Polylinker for C-terminal fusions to LacZ                            | Schneider et al. 2013         |
| pJSS151                   | pMB111/RslA-PhoA                                                     | Schneider et al. 2013         |
| pJSS153                   | pMB111/RsdA-PhoA                                                     | This study                    |
| pJSS154                   | pMB111/RsgA-PhoA                                                     | This study                    |
| pJSS156                   | pJSSMSG1/RslA-LacZ                                                   | Schneider et al. 2013         |
| pJSS158                   | pJSSMSG1/RsdA-LacZ                                                   | This study                    |
| pJSS159                   | pJSSMSG1/RsgA-LacZ                                                   | This study                    |
|                           |                                                                      |                               |
| pMV26<br>1                | Episomal mycobacterial vector                                        | Laboratory collection         |
| pJSS127                   | pMV261 / constitutive groEL promoter, N-terminal MBP with polylinker | pReceiver-B07                 |
| pJSS135                   | pJSS127 / N-terminal MBP-RsdA                                        | This study                    |
| pJSS144                   | pJSS127 / N-terminal MBP-RsgA                                        | This study                    |
|                           |                                                                      |                               |
| pJSS145                   | knockout construct for sigD::hyg                                     | This study                    |
| pJSS146                   | knockout construct for rsdA::hyg                                     | This study                    |
