# Supplementary material
Source: PubMed Central journal article supplement (PMC4097585)
Supplement: JB.01537-14_zjb999093233so3.pdf [file JB.01537-14_zjb999093233so3.pdf]

| <b>Table S3. Oligonucleotides</b> |                            |                   |
|-----------------------------------|----------------------------|-------------------|
| rv1815cF                          | 5'-CAGACCGGGTGTGGTTCTTC-3' | This study        |
| rv1815cR                          | 5'-CAGCCGTTGTTGACGCTTTC-3' | This study        |
| rpfCF                             | 5'-ACCACAGTGCATCGGAAGG-3'  | Sklar et al. 2010 |
| rpfCR                             | 5'-ATCGGGTTCTCGCCGAACAG-3' | Sklar et al. 2010 |
